# Supplementary material for: Construction of Fe-doped CoP with hybrid nanostructures as a bifunctional catalyst for overall water splitting
Source: Royal Society of Chemistry journal article supplement (doi:10.1039/d1dt03292e), 2021-01-01
Supplement: d1dt03292e1.pdf [file d1dt03292e1.pdf]

## Supporting Information

### **Construction of Fe-doped CoP with hybrid nanostructures as a bifunctional catalyst for overall water splitting**

Qinghua Yang<sup>1</sup>, Haojiang Dai,<sup>2</sup> Wenhao Liao,<sup>2</sup> Xianfeng Tong,<sup>2</sup> Yingyan Fu,<sup>2</sup> Min Qian,<sup>2</sup> Tianyun Chen<sup>2\*</sup>

<sup>1</sup>School of Food and Biological Engineering, Hefei University of Technology, Hefei, Anhui 230009, P. R. China

<sup>2</sup>School of Chemistry and Chemical Engineering, Hefei University of Technology, Hefei, Anhui 230009, P. R. China

## Supplementary Figures and Tables

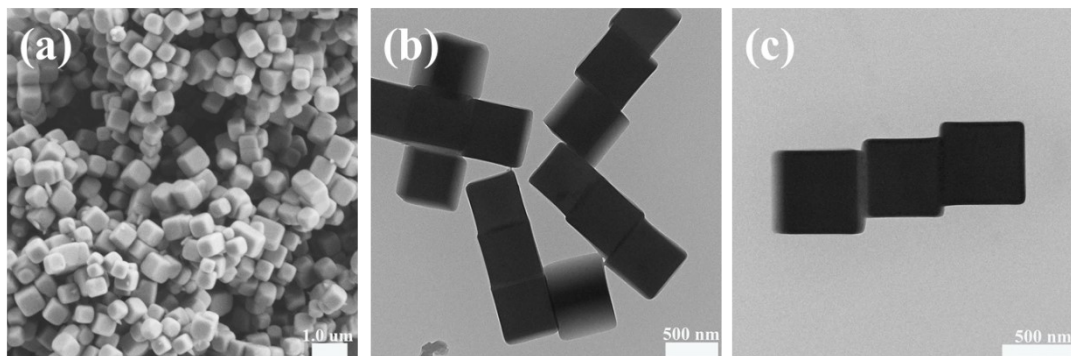

**Fig. S1** (a) SEM and (b, c) TEM images of Co-PBA

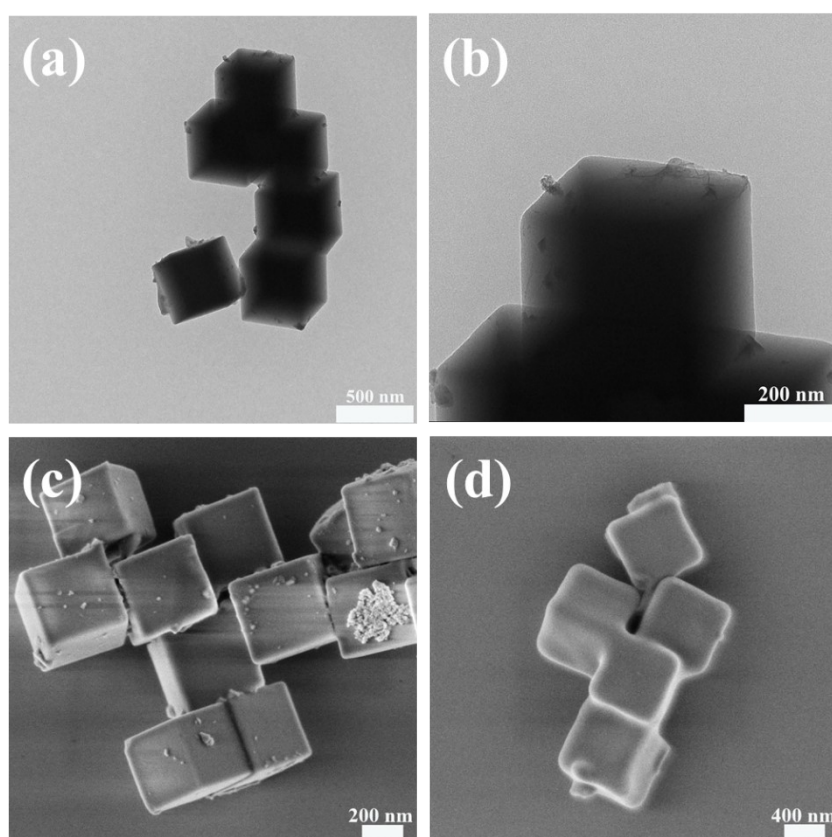

**Fig. S2** (a, b) TEM and (c) SEM images of HIP and (d) SEM image of CoP without doping of  $\text{Fe}^{3+}$

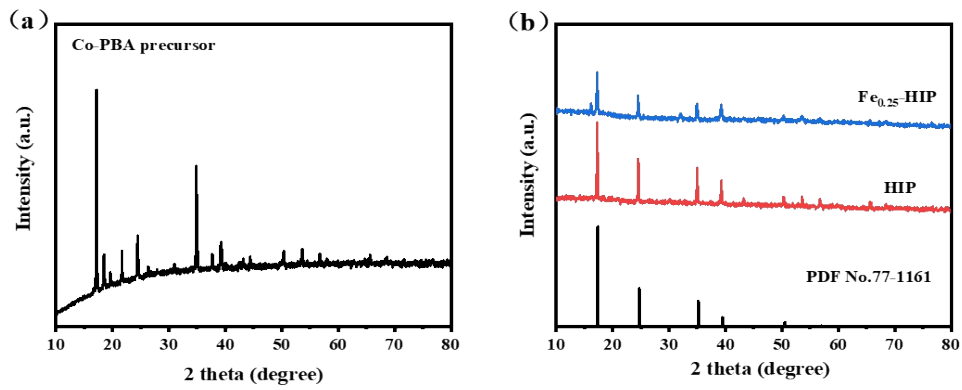

**Fig. S3** XRD pattern of Co-PBA, HIP and Fe<sub>0.25</sub>-HIP

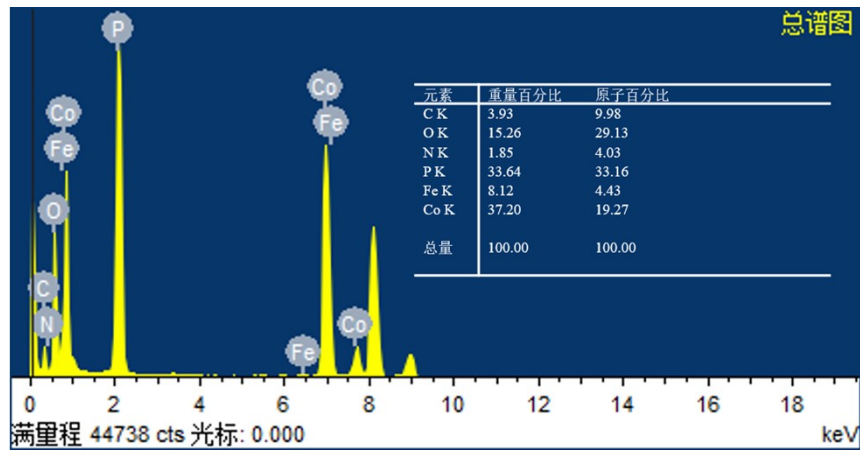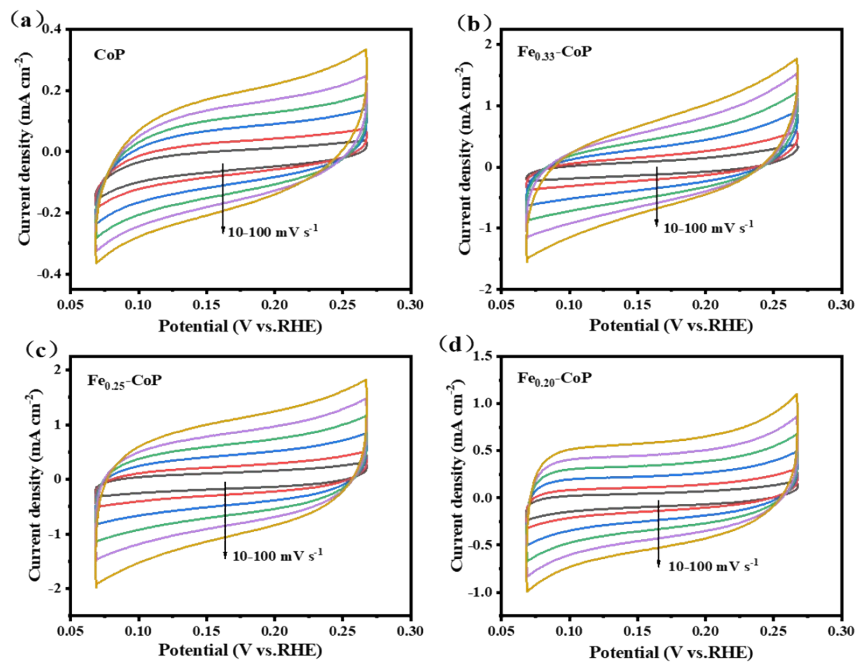

**Fig. S4** The elemental composition and contents of Fe<sub>0.25</sub>-CoP

**Fig. S5** CV curves of (a) CoP, (b) Fe<sub>0.33</sub>-CoP, (c) Fe<sub>0.25</sub>-CoP and (d) Fe<sub>0.20</sub>-CoP for HER

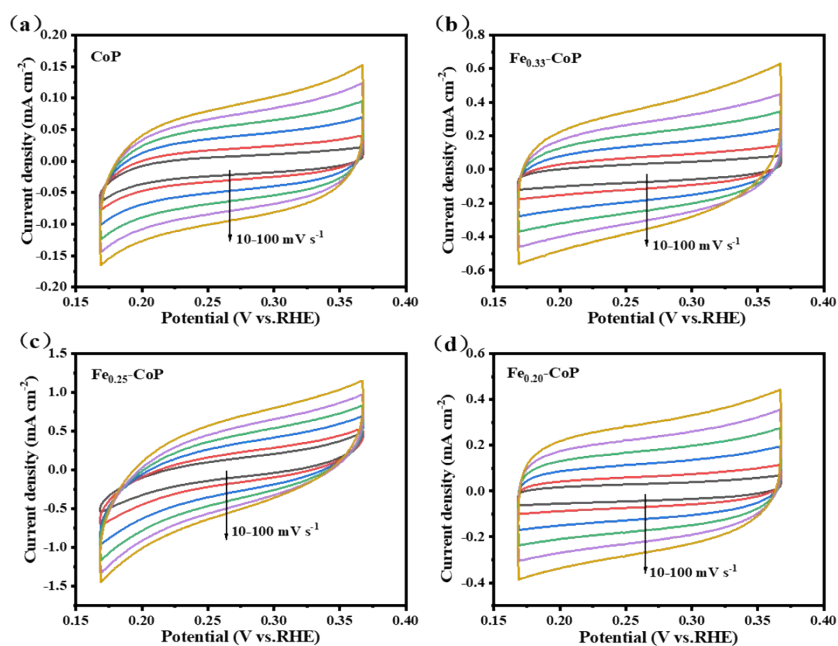

**Fig. S6** CV curves of (a) CoP, (b) Fe<sub>0.33</sub>-CoP, (c) Fe<sub>0.25</sub>-CoP and (d) Fe<sub>0.20</sub>-CoP for OER

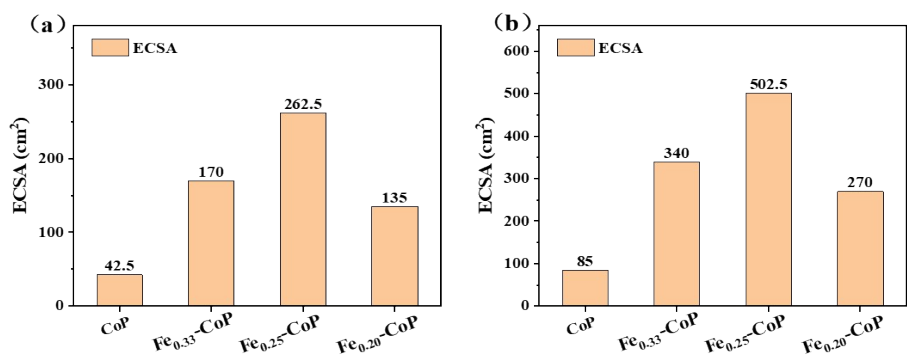

**Fig. S7** The electrochemical surface area (ECSA) of CoP, Fe<sub>0.33</sub>-CoP, Fe<sub>0.25</sub>-CoP and Fe<sub>0.20</sub>-CoP

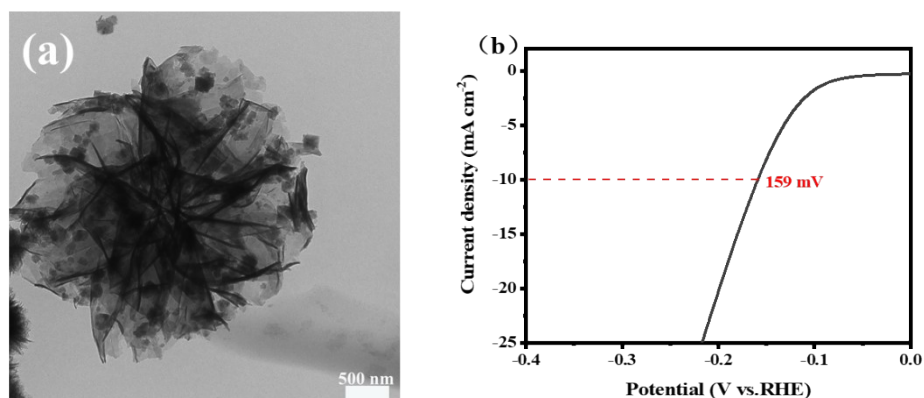

**Fig. S8** (a) TEM image and (b) polarization curves of the phosphide which was prepared without the addition of Co-PBA

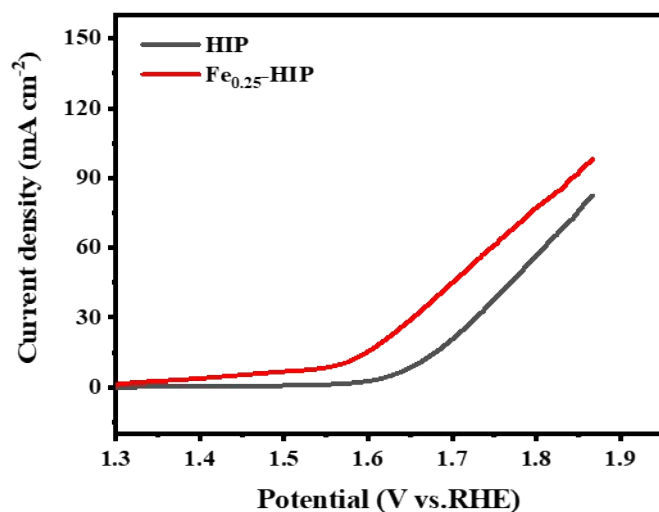

**Fig. S9** Polarization curves of HIP and Fe<sub>0.25</sub>-HIP measured in 1.0 M KOH electrolyte

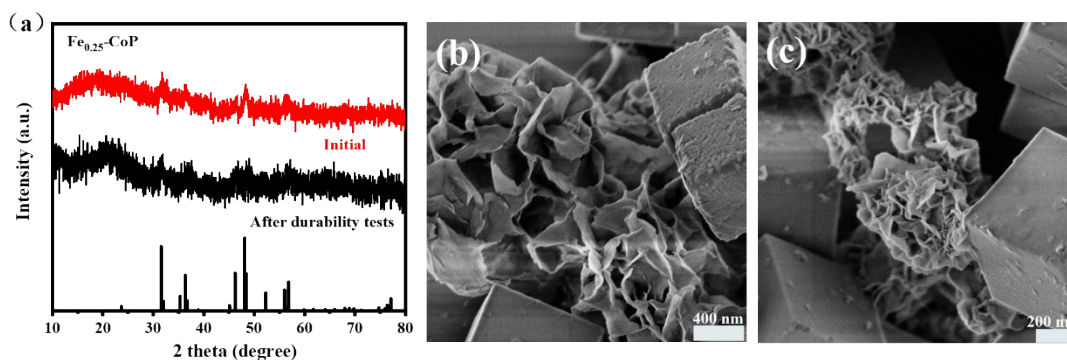

**Fig. S10** (a) XRD pattern and SEM image (b) before and (c) after durability tests for Fe<sub>0.25</sub>-CoP

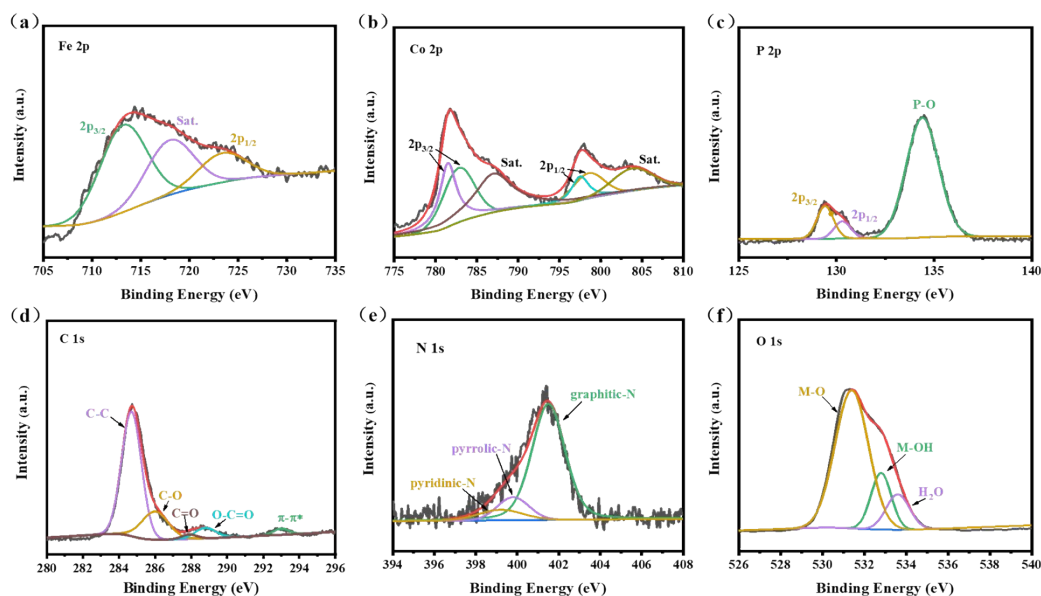

**Fig. S11** XPS spectra of (a) survey, (b) Co 2p, (c) P 2p and (d) Fe 2p for Fe<sub>0.25</sub>-CoP after the water oxidation

**Table. S1** Comparison of the overall water splitting properties of Fe<sub>0.25</sub>-CoP with some previously reported bifunctional catalysts

| Catalyst                                                               | Voltage at 10 mA·cm <sup>-2</sup> (V) | Electrolyte | Reference   |
|------------------------------------------------------------------------|---------------------------------------|-------------|-------------|
| Fe <sub>0.25</sub> -CoP                                                | 1.57                                  | 1.0 M KOH   | [This work] |
| (Ni <sub>11</sub> (HPO <sub>3</sub> ) <sub>8</sub> (OH) <sub>6</sub> ) | 1.60                                  | 1.0 M KOH   | 1           |
| Ni/NiS/NC                                                              | 1.61                                  | 1.0 M KOH   | 2           |
| C-(Fe-Ni)P@PC/(Ni-Co)P@CC                                              | 1.63                                  | 1.0 M KOH   | 3           |
| MoS <sub>2</sub> /LDH                                                  | 1.57                                  | 1.0 M KOH   | 4           |
| VOOH-3Fe                                                               | 1.53                                  | 1.0 M KOH   | 5           |
| E-Mo-NiCoP                                                             | 1.61                                  | 1.0 M KOH   | 6           |
| Co <sub>4</sub> S <sub>3</sub> /Mo <sub>2</sub> C-NSC                  | 1.62                                  | 1.0 M KOH   | 7           |
| CoP NF                                                                 | 1.65                                  | 1.0 M KOH   | 8           |
| P-CoS <sub>2</sub> HNA/CC                                              | 1.56                                  | 1.0 M KOH   | 9           |
| Ni/Ni(OH) <sub>2</sub>                                                 | 1.59                                  | 1.0 M KOH   | 10          |

## References

1. P. W. Menezes, C. Panda, S. Loos, F. Bunschei-Bruns, C. Walter, M. Schwarze, X. Deng, H. Dau and M. Driess, *Energy Environ. Sci.*, 2018, **11**, 1287-1298.
2. J. Ding, S. Ji, H. Wang, H. Gai, F. Liu, V. Linkov and R. Wang, *Int. J. Hydrog. Energy*, 2019, **44**, 2832-2840.
3. C.-N. Lv, L. Zhang, X.-H. Huang, Y.-X. Zhu, X. Zhang, J.-S. Hu and S.-Y. Lu, *Nano Energy*, 2019, **65**, 103995.
4. P. Xiong, X. Zhang, H. Wan, S. Wang, Y. Zhao, J. Zhang, D. Zhou, W. Gao, R. Ma, T. Sasaki and G. Wang, *Nano Lett*, 2019, **19**, 4518-4526.
5. J. Zhang, R. Cui, C. Gao, L. Bian, Y. Pu, X. Zhu, X. Li and W. Huang, *Small*, 2019, **15**, 1904688.
6. J. Lin, Y. Yan, C. Li, X. Si, H. Wang, J. Qi, J. Cao, Z. Zhong, W. Fei and J. Feng, *Nanomicro Lett*, 2019, **11**, 55.
7. Y. Liu, X. Luo, C. Zhou, S. Du, D. Zhen, B. Chen, J. Li, Q. Wu, Y. Iru and D. Chen, *Appl. Catal. B*, 2020, **260**, 118197.
8. L. Ji, J. Wang, X. Teng, T. J. Meyer and Z. Chen, *ACS Catal.*, 2019, **10**, 412-419.
9. Y. Li, Z. Mao, Q. Wang, D. Li, R. Wang, B. He, Y. Gong and H. Wang, *Chem. Eng. J.*, 2020, **390**.

10. L. Dai, Z. N. Chen, L. Li, P. Yin, Z. Liu and H. Zhang, *Adv Mater*, 2020, **32**, 1906915.
